# Supplementary material for: Low cadmium (LCD), a novel gene related to cadmium tolerance and accumulation in rice
Source: PubMed Central journal article supplement — J Exp Bot. 2011 Sep 9;62(15):5727–34. doi: 10.1093/jxb/err300 (PMC3223062; doi:10.1093/jxb/err300), 2011-09-09

## Low cadmium (LCD), a novel gene related to cadmium tolerance and accumulation in rice

*Hugo Shimo, Yasuhiro Ishimaru, Gynheung An, Takashi Yamakawa, Hiromi Nakanisih, and Naoko K Nishizawa*

Table S1. Down regulated (ratio 0.5 or less) genes in microarray analysis in both shoots and roots of *lcd*. Signal, signal intensity in WT (cv. Hwayoung) for roots and shoots; *lcd*/WT, ratio of *lcd* in relation to WT in roots and shoots; *tos*/WT, ratio of *lcd-tos17* in relation to WT in roots and shoots.

| Locus        | Description                                  | Signal (WT;HW) |       | <i>lcd</i> /WT |       | <i>tos</i> /WT |       |
|--------------|----------------------------------------------|----------------|-------|----------------|-------|----------------|-------|
|              |                                              | Root           | Shoot | Root           | Shoot | Root           | Shoot |
| Os01g0956700 | LCD                                          | 411            | 417   | 0.0            | 0.0   | 0.0            | 0.0   |
| Os01g0702500 | Dehydrin RAB25.                              | 34             | 106   | 0.1            | 0.5   | 0.1            | 0.7   |
| Os08g0176000 | Integrase domain containing protein.         | 60             | 8     | 0.2            | 0.7   | 0.2            | 1.2   |
| Os05g0297000 | Hypothetical protein.                        | 6              | 3     | 0.3            | 0.7   | 0.2            | 1.0   |
| Os05g0372300 | Cytochrome P450 monooxygenase.               | 96             | 9     | 0.5            | 0.8   | 0.2            | 0.7   |
| Os07g0641500 | Reverse transcriptase (Fragment).            | 22             | 8     | 0.4            | 0.6   | 0.3            | 1.2   |
| Os05g0160600 | Peptidase, trypsin-like.                     | 3040           | 701   | 0.2            | 0.5   | 0.3            | 0.7   |
| Os07g0641400 | Hypothetical protein.                        | 590            | 144   | 0.4            | 0.2   | 0.3            | 0.3   |
| Os05g0161500 | RelA/SpoT domain containing protein.         | 662            | 14859 | 0.2            | 1.2   | 0.4            | 0.8   |
| Os01g0339500 | Conserved hypothetical protein.              | 25             | 83    | 0.2            | 0.2   | 0.4            | 0.1   |
| Os10g0432200 | ATP-binding cassette sub-family E.           | 6745           | 3401  | 0.3            | 0.2   | 0.4            | 0.3   |
| Os12g0444500 | Conserved hypothetical protein.              | 105            | 205   | 0.1            | 0.5   | 0.4            | 0.6   |
| Os02g0139500 | Cycloartenol synthase (EC 5.4.99.8).         | 675            | 499   | 0.3            | 0.2   | 0.4            | 0.4   |
| Os02g0725900 | Transcription factor CBF/NF-Y/archaeal       | 144            | 7     | 0.0            | 0.6   | 0.4            | 1.2   |
| Os10g0392900 | Lipolytic enzyme, G-D-S-L family protein.    | 468            | 3     | 0.4            | 1.2   | 0.4            | 1.7   |
| Os12g0406000 | Hypothetical protein.                        | 48             | 3741  | 0.3            | 0.0   | 0.5            | 0.4   |
| Os09g0329000 | BURP domain containing protein.              | 7              | 7     | 0.3            | 0.8   | 0.5            | 1.1   |
| Os05g0212900 | Chalcone synthase J .                        | 293            | 9     | 0.4            | 1.4   | 0.5            | 1.6   |
| Os12g0187800 | Hypothetical protein.                        | 34             | 4     | 0.3            | 0.7   | 0.5            | 0.7   |
| Os02g0616600 | Conserved hypothetical protein.              | 78             | 9     | 0.3            | 0.4   | 0.5            | 0.5   |
| Os04g0503200 | CDPK11.                                      | 11             | 345   | 1.0            | 0.0   | 0.7            | 0.3   |
| Os04g0667300 | Hypothetical protein.                        | 45             | 45    | 0.4            | 0.4   | 0.8            | 0.4   |
| Os12g0152200 | Cyclin-like F-box domain containing protein. | 2              | 56    | 1.1            | 0.5   | 1.2            | 0.3   |
| Os07g0136300 | Conserved hypothetical protein.              | 2              | 5     | 1.1            | 0.4   | 1.2            | 0.4   |

Table S2. Up regulated (ratio 2 or more) genes in microarray analysis in both shoots and roots of *lcd*. Signal, signal intensity in WT (cv. Hwayoung) for roots and shoots; *lcd*/WT, ratio of *lcd* in relation to WT in roots and shoots; *tos*/WT, ratio of *lcd-tos17* in relation to WT in roots and shoots.

| Locus        | Description                                    | Signal (WT;HW) |       | <i>lcd</i> /WT |       | <i>tos</i> /WT |       |
|--------------|------------------------------------------------|----------------|-------|----------------|-------|----------------|-------|
|              |                                                | Root           | Shoot | Root           | Shoot | Root           | Shoot |
| Os01g0533900 | Multidrug resistance protein 1 homolog.        | 1650           | 88    | 3              | 3     | 2              | 2     |
| Os01g0567200 | Conserved hypothetical protein.                | 11             | 68    | 61             | 15    | 65             | 5     |
| Os01g0909500 | Nucleosome binding protein 1                   | 26             | 15    | 3              | 3     | 3              | 3     |
| Os02g0252400 | Zn-finger, Dof type domain containing protein. | 2              | 5     | 25             | 14    | 56             | 8     |
| Os03g0115800 | Conserved hypothetical protein.                | 2              | 3     | 173            | 201   | 247            | 242   |
| Os03g0629800 | Conserved hypothetical protein.                | 36             | 5     | 70             | 95    | 161            | 69    |
| Os03g0714800 | En/Spm-like transposon family protein.         | 2              | 3     | 119            | 153   | 37             | 28    |
| Os07g0511100 | Glycine-rich protein precursor.                | 176            | 494   | 24             | 4     | 504            | 94    |
| Os11g0282700 | Homeodomain-like containing protein.           | 2              | 3     | 16             | 11    | 94             | 18    |

Table S3. Differences in gene expression in different genetic backgrounds of rice. Signal, signal intensity in WT (cv. Nipponbare and Hwayoung) for roots and shoots. Nip/Hw, ratio of Nipponbare in relation to Hwayoung in roots and shoots.

| Locus        | Description | Signal (root) |       | Ratio  | Signal (shoot) |      | Ratio  |
|--------------|-------------|---------------|-------|--------|----------------|------|--------|
|              |             | Nip           | Hw    | Nip/Hw | Nip            | Hw   | Nip/Hw |
| Os07g0258400 | OsNramp1    | 9157          | 766   | 12.0   | 2124           | 189  | 11.2   |
| Os07g0232800 | OsZIP8      | 2237          | 573   | 3.9    | 3094           | 978  | 3.2    |
| Os12g0581600 | OsNramp7    | 280           | 530   | 0.5    | 187            | 347  | 0.5    |
| Os03g0411800 | OsZIP2      | 3479          | 4354  | 0.8    | 788            | 1751 | 0.4    |
| Os01g0972200 | OsZIP1      | 11088         | 17093 | 0.6    | 99             | 222  | 0.4    |
| Os05g0472700 | OsZIP5      | 5686          | 5880  | 1.0    | 345            | 823  | 0.4    |
| Os03g0571900 | MatE (PEZ1) | 271           | 252   | 1.1    | 258            | 702  | 0.4    |
| Os07g0257200 | OsNramp5    | 14056         | 20642 | 0.7    | 148            | 800  | 0.2    |

## Supplementary Figure Legends

Figure S1. WT seeds were sown in MS medium containing Cd concentrations at 0, 0.25, 0.5, 1.0, 1.5 and 2.0 mM for 7 days.

Figure S2. Root and shoot metal concentration. WT and *lcd/lcd-tos17* were grown in nutrient solution for 1 week then transferred to nutrient solution with 10  $\mu$ M Cd for another week. A) Shoot and B) root metal concentrations of WT (cv. Hwayoung) and *lcd*. C) Shoot and D) root metal concentrations of WT (cv. Nipponbare) and *lcd-tos17* (n=3). The values followed by different letters are statistically different according to student N-newman-keuls test.

Figure S3. Field grain and leaf metal concentration. WT and *lcd* were grown in an experimental field until harvest. A) Grain and B) leaf metal concentrations of WT (cv. Hwayoung) and *lcd*. (n=25). The values followed by different letters are statistically different according to student N-newman-keuls test.

Supplementary Figure 1.

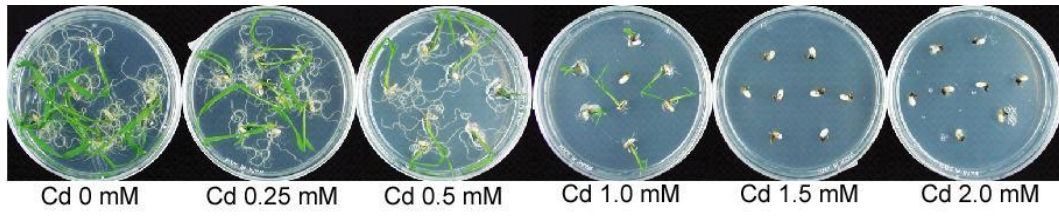

Supplementary Figure 2.

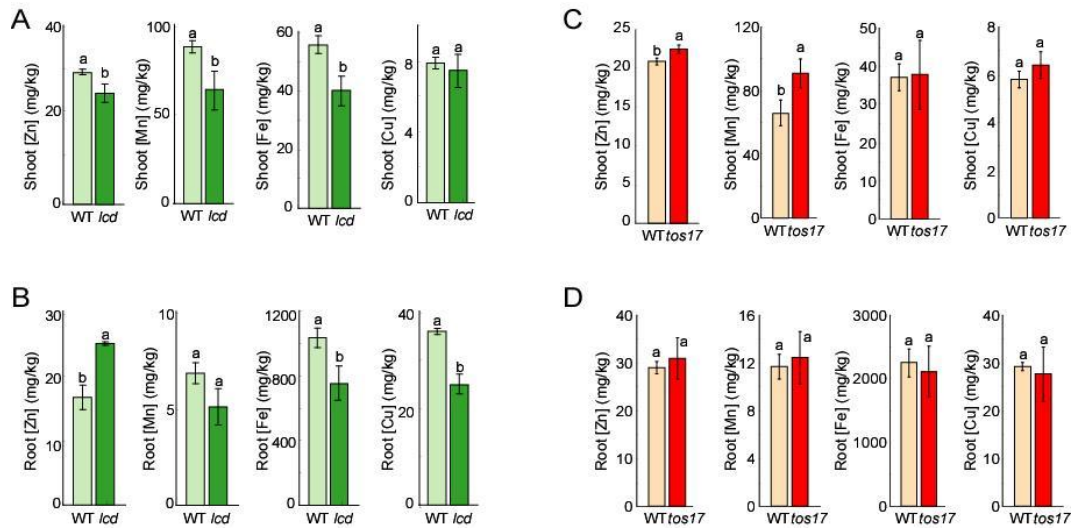

Supplementary Figure 3.

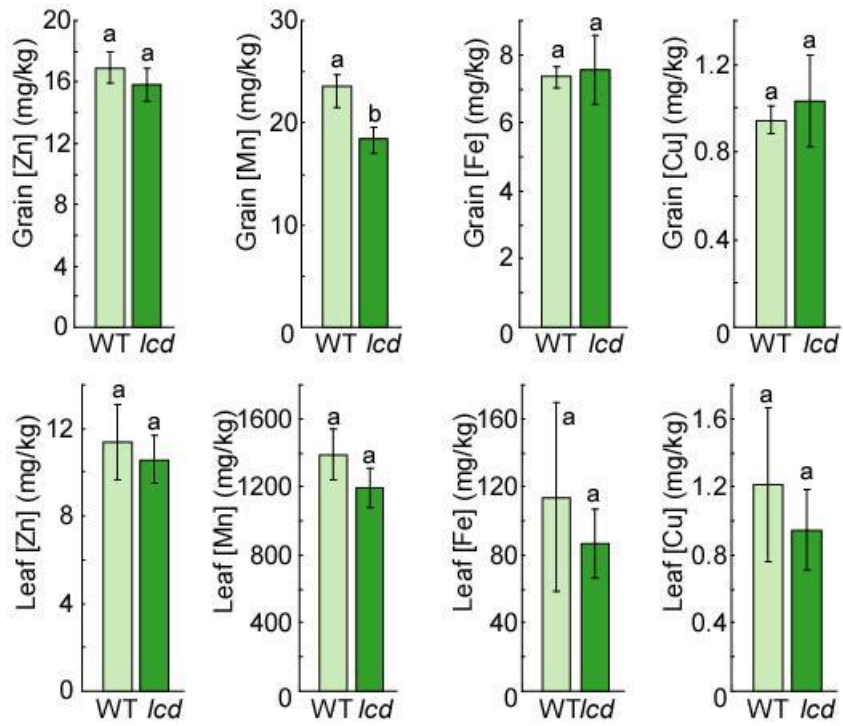

Supplement: supp_err300_00067017_file001.pdf [file supp_err300_00067017_file001.pdf]
